# Supplementary material for: Why Are Medical and Health-Related Studies Not Being Published? A Systematic Review of Reasons Given by Investigators
Source: PubMed Central journal article supplement (PMC4198242; doi:10.1371/journal.pone.0110418), 2014-10-15
Supplement: pone.0110418.s001.pdf [file pone.0110418.s001.pdf]

## Appendix S1: Literature search strategy (Ovid –MEDLINE, EMBASE)

1. publication bias/
2. (file adj1 drawer\*).ti,ab.
3. ((rate\* or full or fully or journal\* or peer-reviewed) adj3 (publish\* or publication\* or non-publication\* or nonpublication\* or unpublish\* or unpublish\*)).ti,ab.
4. ((fate or publish\* or unpublish\* or un-publish\* or publication\* or nonpublication\* or non-publication\*) adj4 (abstracts or presentation\* or meeting\* or conference\* or congress\*)).ti,ab.
5. 1 or 2 or 3 or 4
6. ((survey\* or interview\* or questionnaire\*) and (author\* or researcher\* or investigator\* or trialist\*)).ti,ab.
7. 5 and 6
8. ((factor\* or determinant\* or reason\*) adj4 (publish\* or publication\* or nonpublication\* or non-publication\* or unpublish\* or unpublish\*)).ti,ab.
9. 7 or 8
10. (meta-analysis or systematic review).ti.
11. 9 not 10
