# Supplementary material for: Why Are Medical and Health-Related Studies Not Being Published? A Systematic Review of Reasons Given by Investigators
Source: PubMed Central journal article supplement (PMC4198242; doi:10.1371/journal.pone.0110418), 2014-10-15
Supplement: pone.0110418.s003.pdf [file pone.0110418.s003.pdf]

### Appendix S3: Forest plots of stated reasons for nonpublication of studies

Notes: The number of unpublished studies was used as the denominator to calculate the proportion of non-submission and specific reasons for non-publication for each included survey report. For estimating 95% confidence intervals, heterogeneity testing and meta-regression analyses, proportions of reasons were transformed to normally distributed values using the Freeman-Tukey transformation methods. Then the Freeman-Tukey transformed proportions were transformed back to usual proportions for the forest plots.

#### A3.1 – Proportion of non-submission in un-published studies

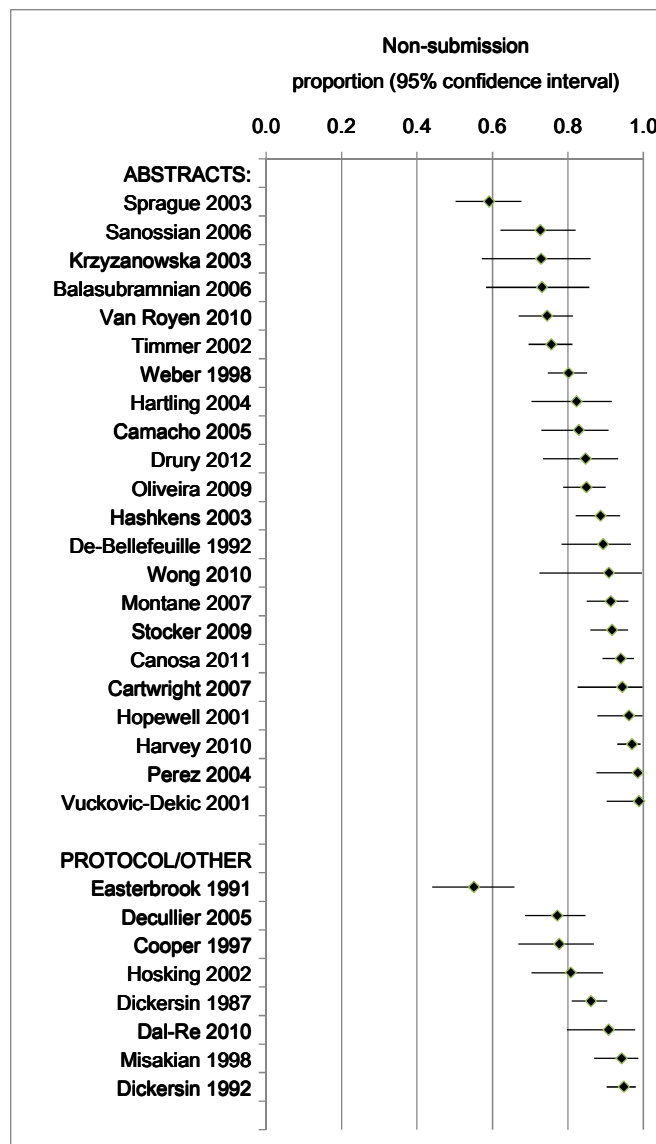

Heterogeneity test result:  $\chi^2 = 211.37$ ,  $df=29$ ; ( $P < 0.001$ );  $I^2 = 86.3\%$  (95% CI 81.5%, 89.8%)

### A3.2 –Study incomplete or still ongoing

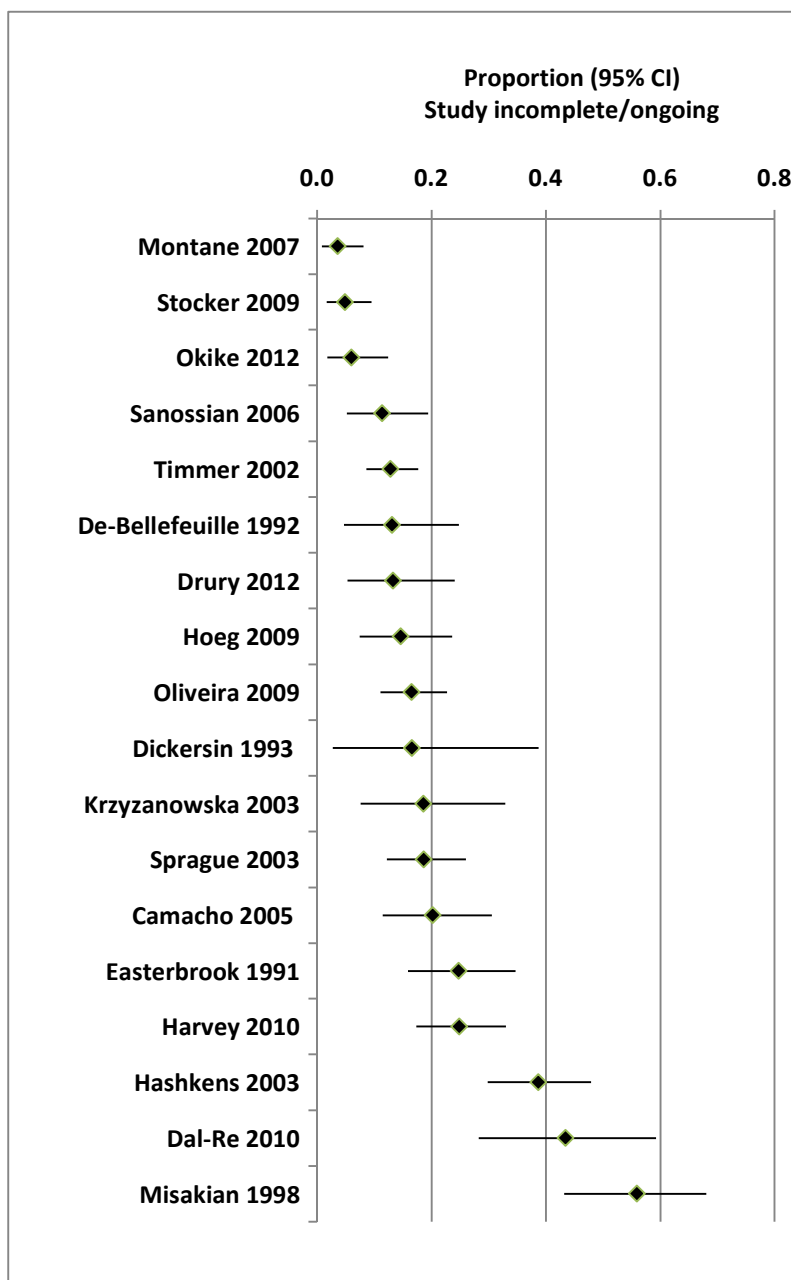

Heterogeneity test result:  $\chi^2=146.1$ ,  $df=17$ ; ( $P<0.001$ );  $I^2=88.4\%$  (95% CI 83.1%, 92.0%)

### A3.3 – Manuscript in preparation or under review

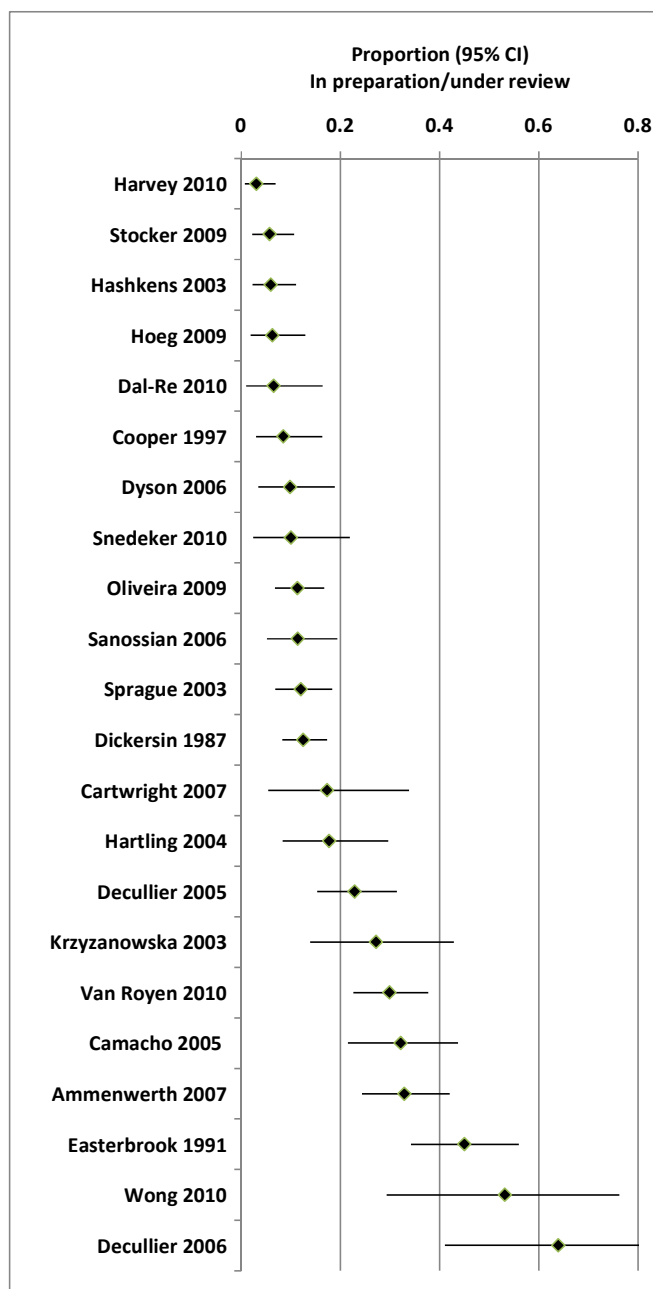

Heterogeneity test result:  $\chi^2=186.8$ ,  $df=21$ ; ( $P<0.001$ );  $I^2=88.8\%$  (95% CI 84.3%, 91.9%)

### A3.4 – Study not for publication (e.g., feasibility or pilot trials)

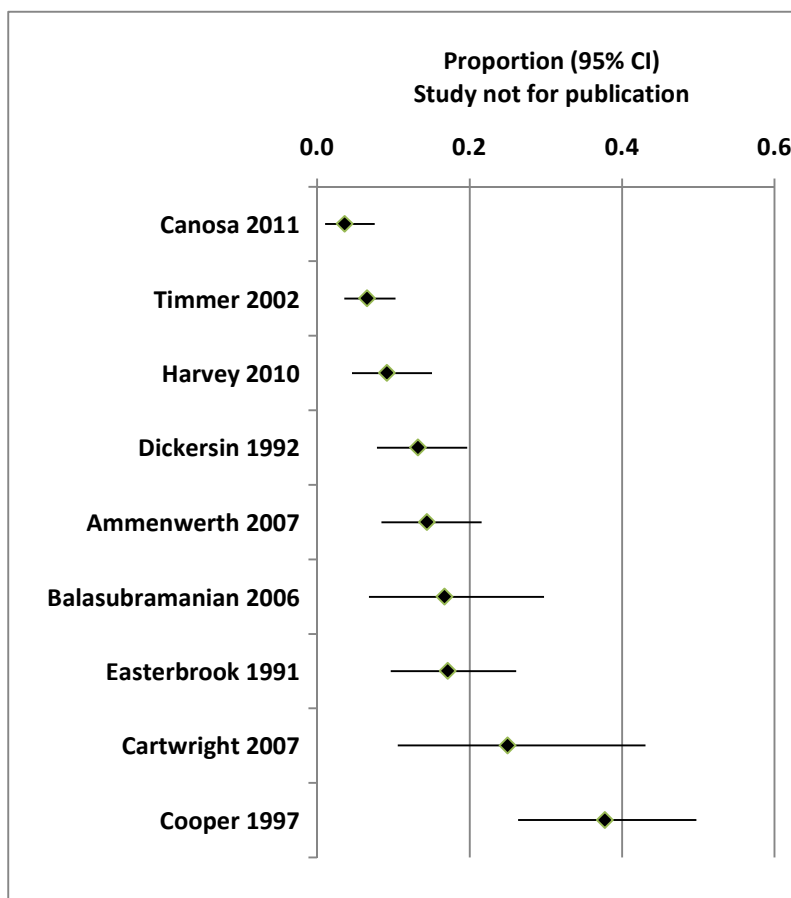

Heterogeneity test result:  $\chi^2=52.3$ ,  $df=8$ ; ( $P<0.001$ );  $I^2=84.7\%$  (95% CI 72.7%, 91.4%)

### A3.5 – Similar findings published by others

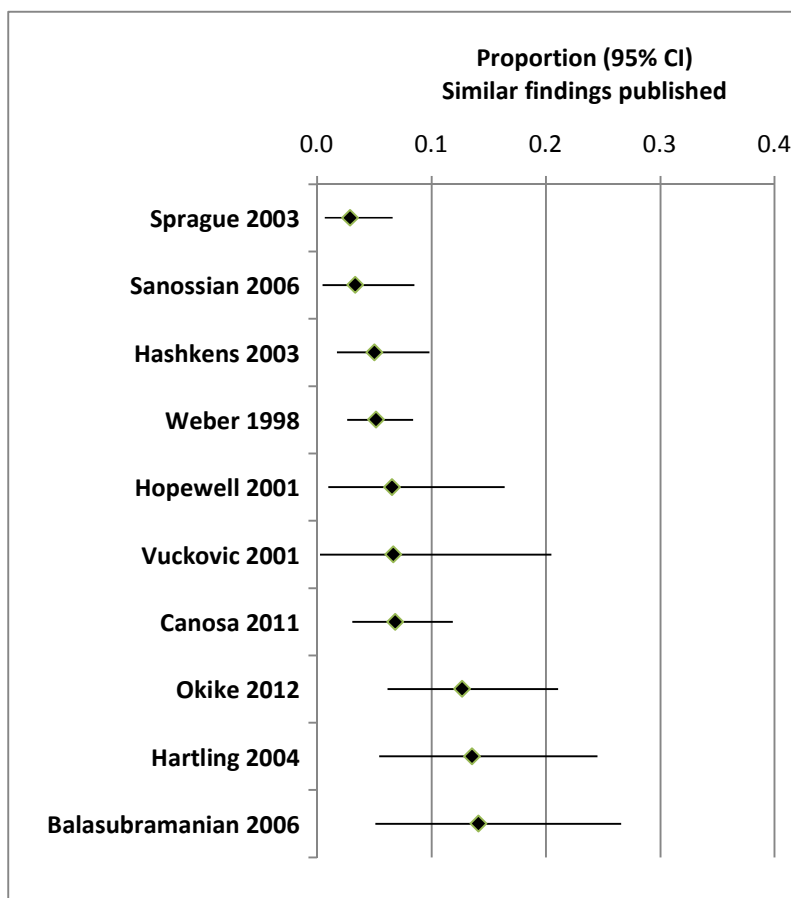

Heterogeneity test result:  $\chi^2=15.0$ ,  $df=9$ ; ( $P<0.091$ );  $I^2=40.0\%$  (95% CI 0.0%, 71.4%)

### A3.6 –Submission rejected by journal

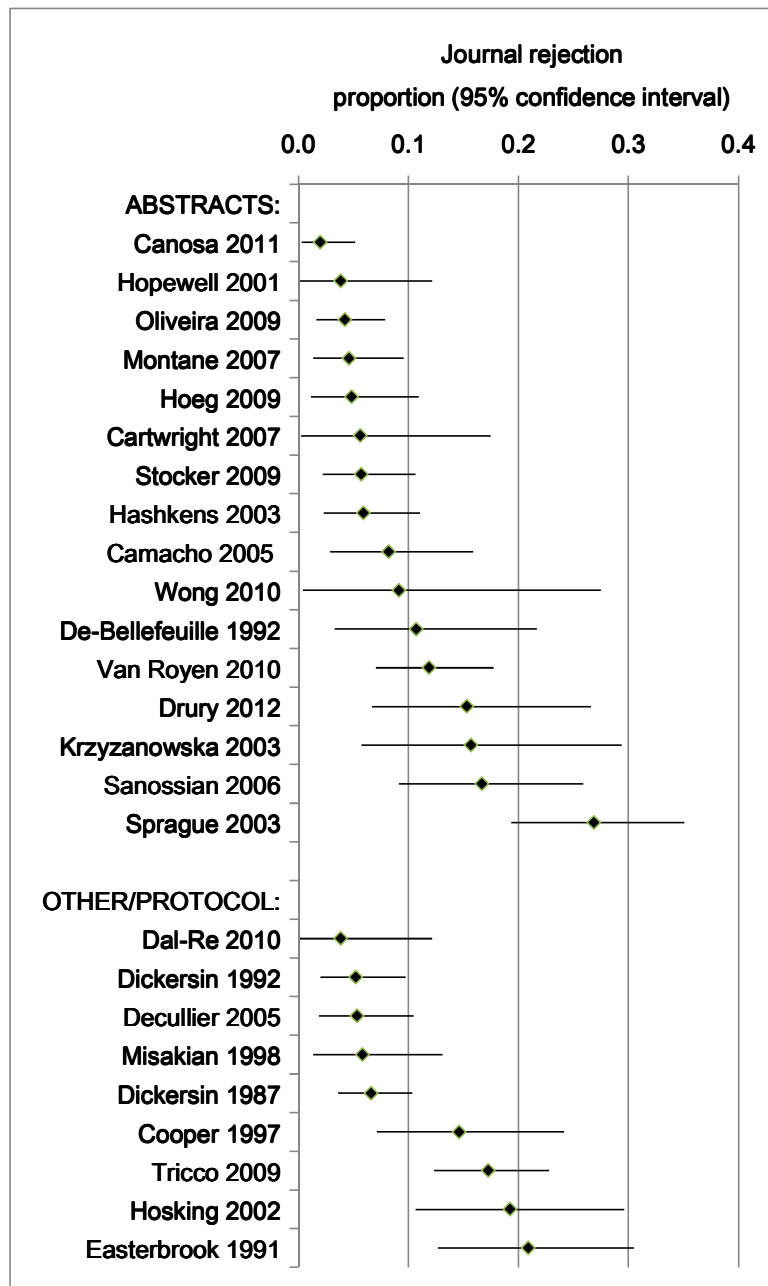

Heterogeneity test result:  $\chi^2=105.1$ ,  $df=24$ ; ( $P<0.001$ );  $I^2=77.2\%$  (95% CI 66.7%, 84.4%)

### A3.7 – Fear of being rejected

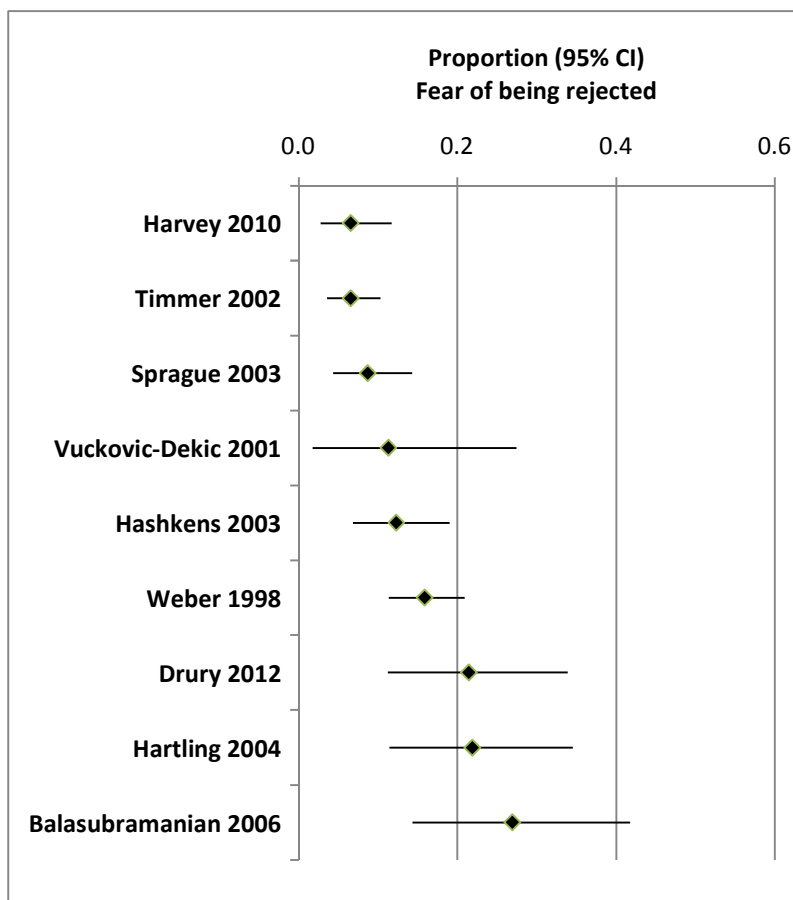

Heterogeneity test result:  $\chi^2=28.2$ ,  $df=8$ ; ( $P<0.001$ );  $I^2=71.7\%$  (95% CI 44.2%, 85.6%)

### A3.8 – Lack of time or low priority

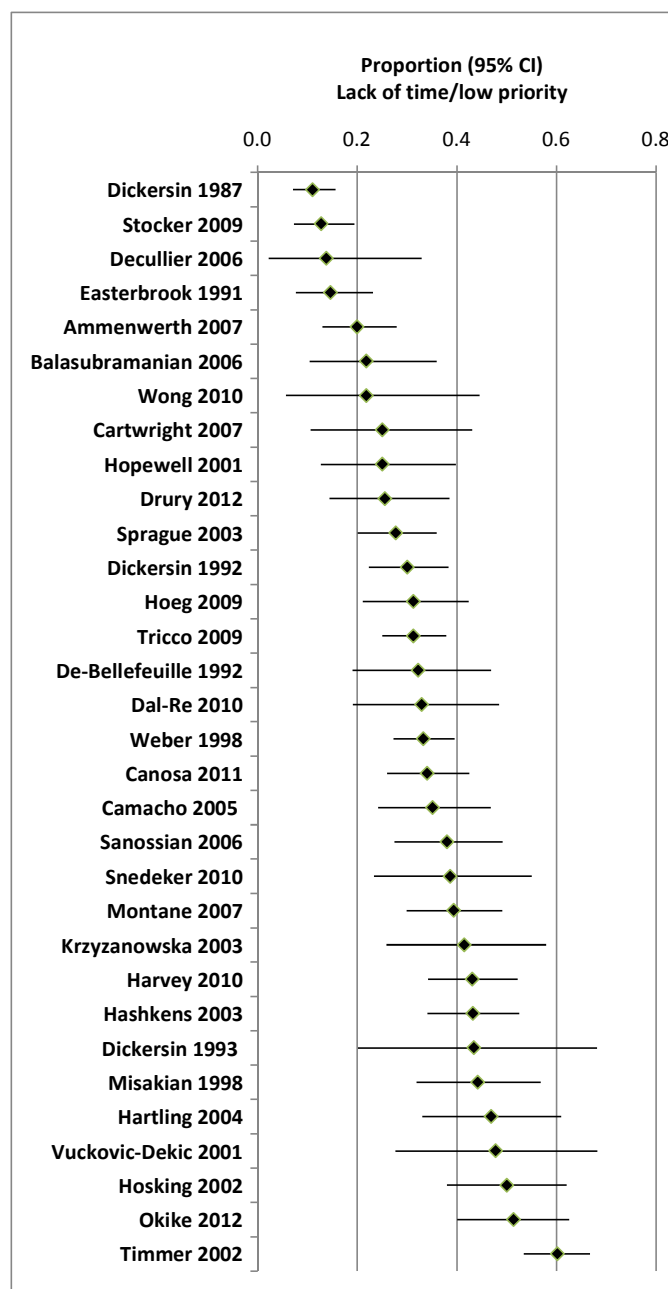

Heterogeneity test result:  $\chi^2=232.7$ ,  $df=31$ ; ( $P<0.001$ );  $I^2=86.7\%$  (95% CI 82.3%, 90.0%)



### A3. 9 – Not important or negative results

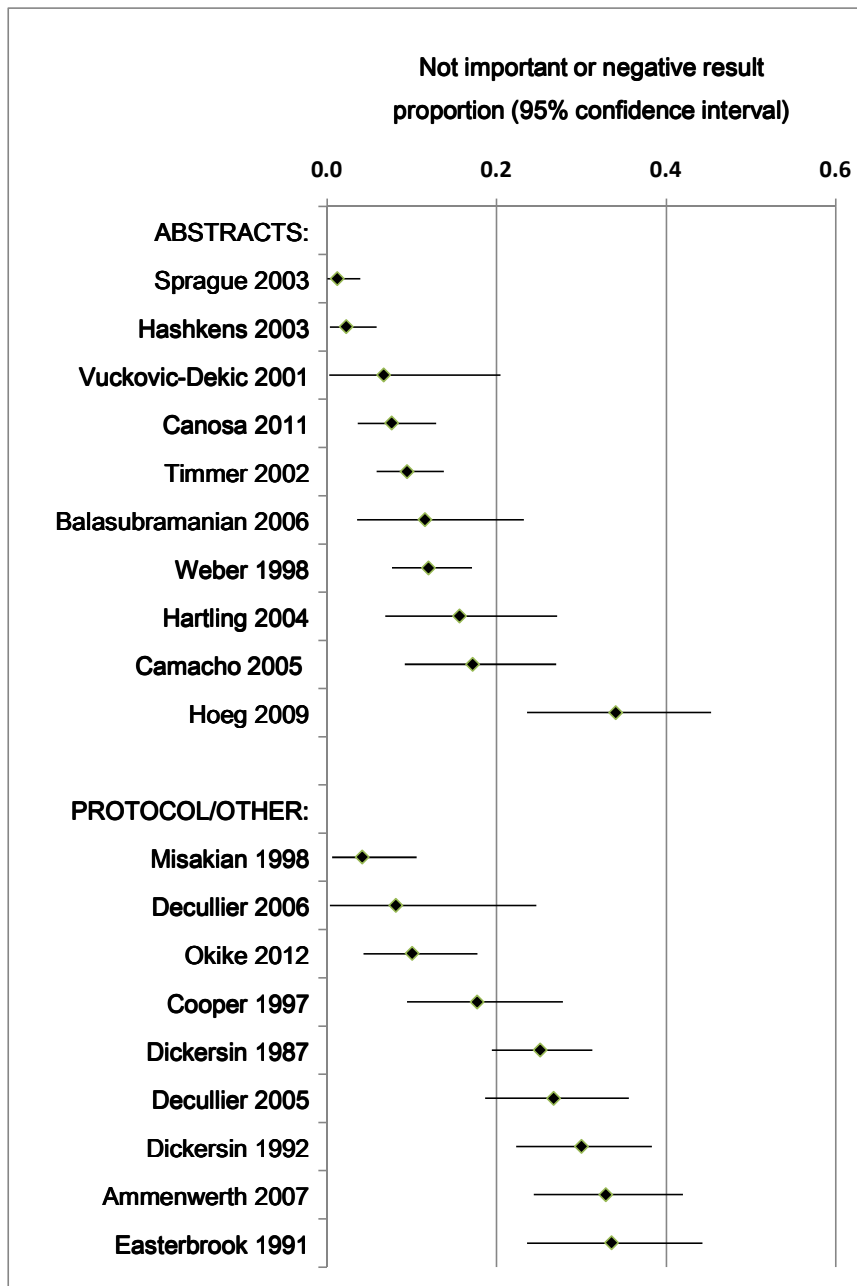

Heterogeneity test result:  $\chi^2=183.8$ ,  $df=18$ ; ( $P<0.001$ );  $I^2=90.2\%$  (95% CI 86.2%, 93.1%)

### A3.10 – Poor study quality or methodology

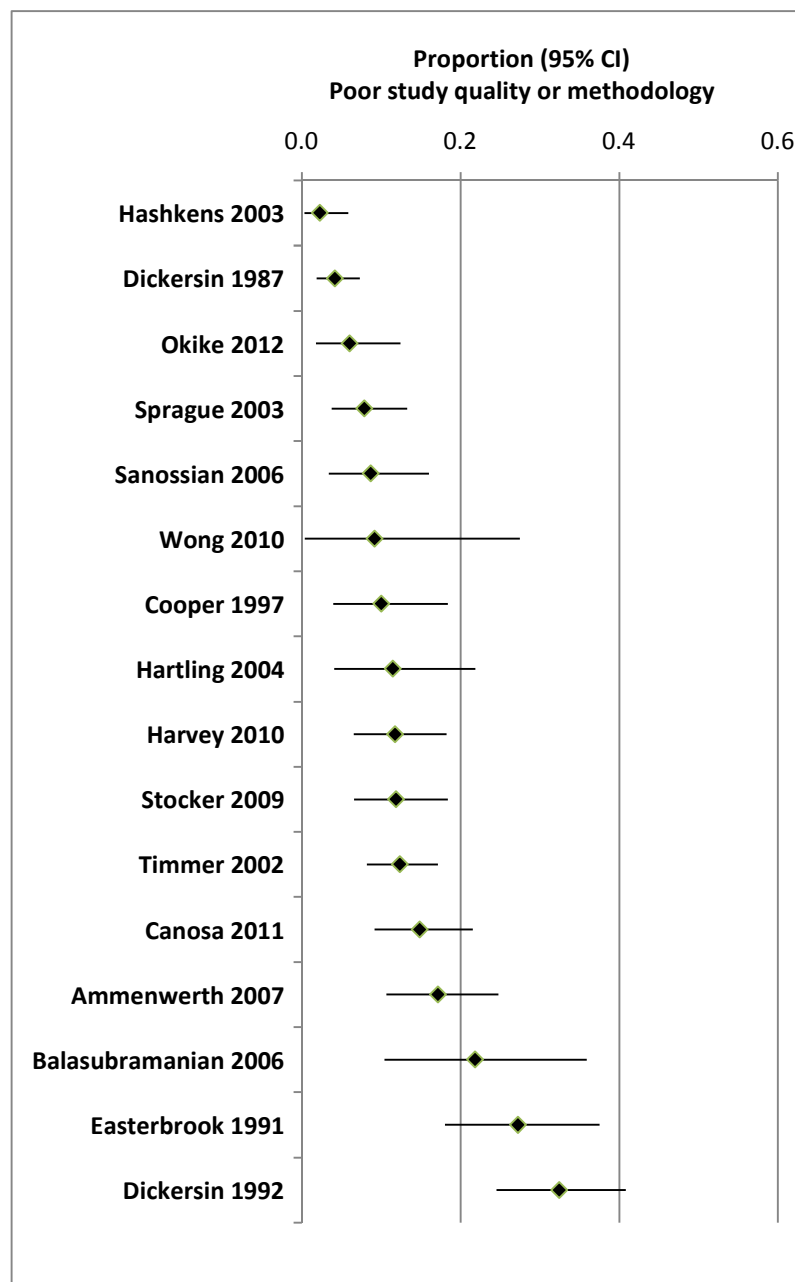

Heterogeneity test result:  $\chi^2=92.8$ ,  $df=15$ ; ( $P<0.001$ );  $I^2=83.8\%$  (95% CI 75.1%, 89.5%)

### A3.11 – Sponsor or funder problem

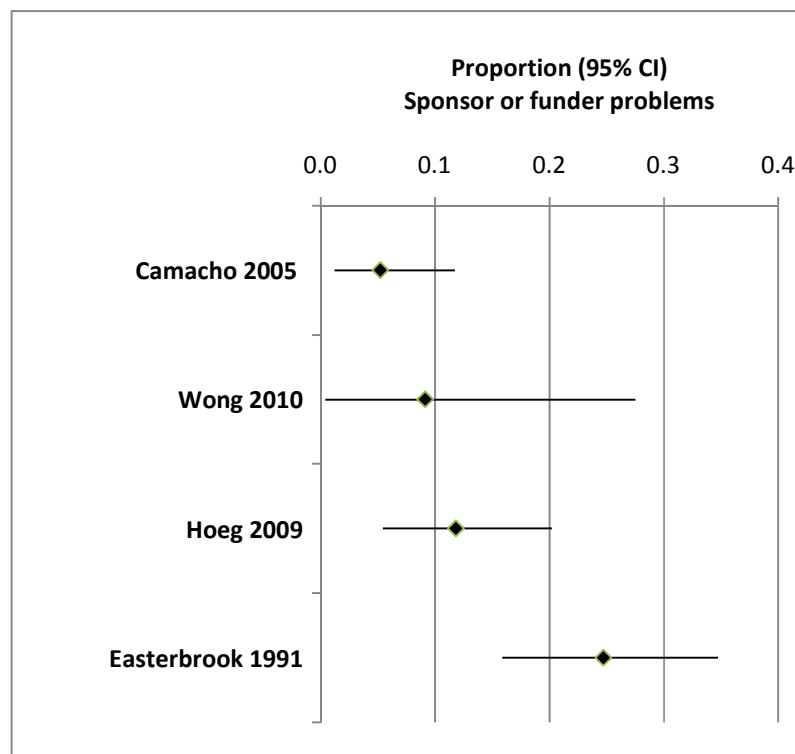

Heterogeneity test result:  $\chi^2=12.7$ ,  $df=3$ ; ( $P=0.005$ );  $I^2=76.4\%$  (95% CI 35.3%, 91.4%)

### A3.12 – Author/co-author problem

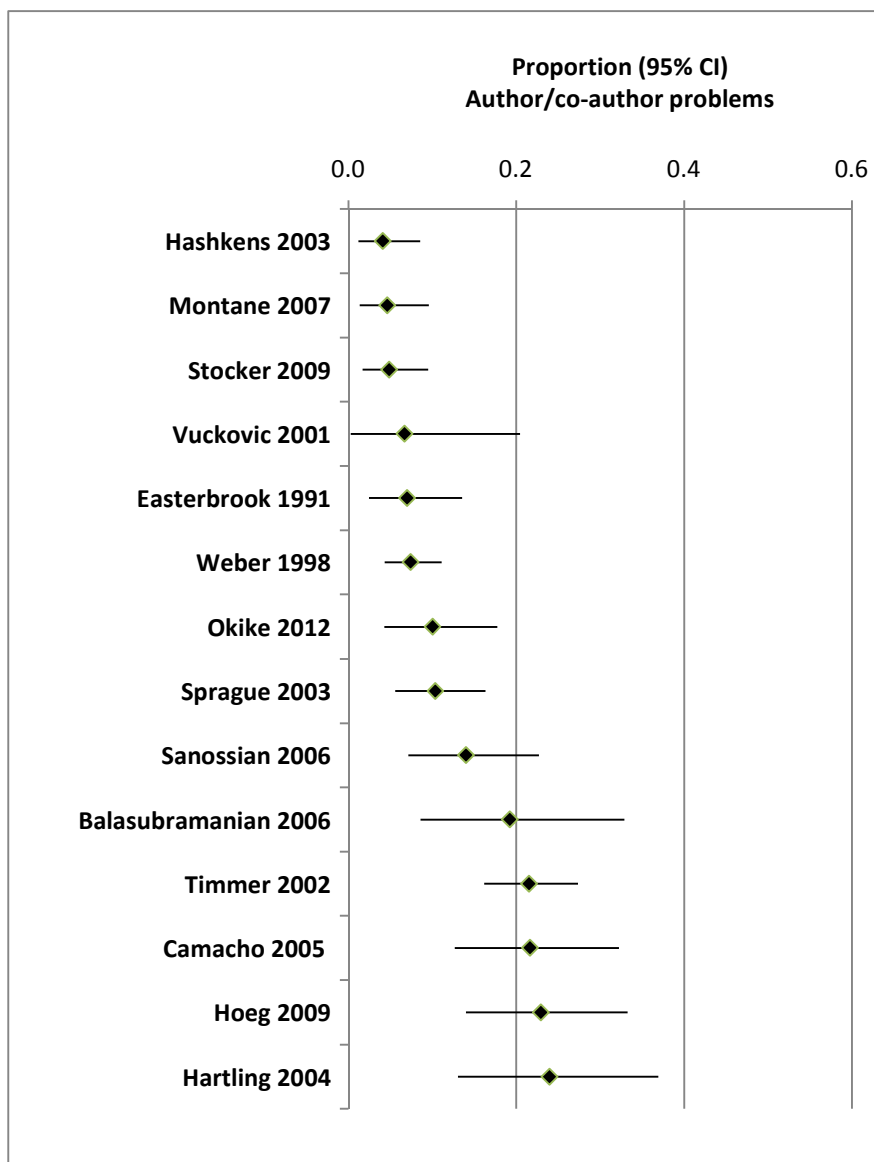

Heterogeneity test result:  $\chi^2=64.7$ ,  $df=13$ ; ( $P<0.001$ );  $I^2=79.9\%$  (95% CI 67.1%, 87.7%)
