# Supplementary material for: Why Are Medical and Health-Related Studies Not Being Published? A Systematic Review of Reasons Given by Investigators
Source: PubMed Central journal article supplement (PMC4198242; doi:10.1371/journal.pone.0110418), 2014-10-15
Supplement: pone.0110418.s004.pdf [file pone.0110418.s004.pdf]

**Appendix S4: Results of meta-regression analyses of differences between subgroups.**

| Reasons                         | No. of included surveys | Estimated coefficients (95% confidence interval); P-value |                                   |                                   |                                   |                                                             |
|---------------------------------|-------------------------|-----------------------------------------------------------|-----------------------------------|-----------------------------------|-----------------------------------|-------------------------------------------------------------|
|                                 |                         | Abstracts vs. other sources                               | Trials only vs. mixed designs     | Surveys up to 2002 vs. since 2003 | % Response rate                   | Rate of non-submission                                      |
| Non-submission                  | 30                      | 0.075 (-0.187, 0.337)<br>P=0.562                          | -0.032 (-0.334, 0.270)<br>P=0.831 | 0.107 (-0.130, 0.344)<br>P=0.363  | 0.216 (-0.579, 1.012)<br>P=0.581  |                                                             |
| Study incompleteness or ongoing | 18                      | -0.304 (-0.672, 0.064)<br>P=0.099                         | 0.129 (-0.268, 0.526)<br>P=0.501  | -0.266 (-0.585, 0.053)<br>P=0.096 | 0.486 (-0.679, 1.650)<br>P=0.388  | 0.167 (-0.473, 0.808)<br>P=0.582                            |
| In preparation or under review  | 22                      | -0.249 (-0.608, 0.110)<br>P=0.164                         | 0.069 (-0.312, 0.450)<br>P=0.710  | -0.068 (-0.423, 0.288)<br>P=0.696 | 0.363 (-0.659, 1.384)<br>P=0.466  | -0.537 (-1.088, 0.014)<br>P=0.055                           |
| Study not for publication       | 9                       | -0.274 (-0.678, 0.131)<br>P=0.154                         | N.A.                              | -0.137 (-0.594, 0.321)<br>P=0.502 | 0.271 (-0.707, 1.249)<br>P=0.523  | -0.220 (-0.960, 0.519)<br>P=0.493                           |
| Similar findings published      | 10                      | -0.245 (-0.571, 0.081)<br>P=0.122                         | 0.259 (-0.137, 0.655)<br>P=0.170  | 0.099 (-0.123, 0.321)<br>P=0.336  | -0.517 (-1.300, 0.266)<br>P=0.162 | 0.145 (-0.159, 0.450)<br>P=0.296                            |
| Rejection by journal            | 25                      | -0.058 (-0.251, 0.136)<br>P=0.544                         | -0.082 (-0.310, 0.145)<br>P=0.462 | -0.098 (-0.284, 0.087)<br>P=0.286 | -0.321 (-0.991, 0.348)<br>P=0.330 | -1.609 (-2.102, -1.115)<br><b>P&lt;0.001</b> <sup>(1)</sup> |
| Fear of being rejected          | 9                       | N.A.                                                      | 0.258 (-0.289, 0.805)<br>P=0.301  | 0.112 (-0.256, 0.479)<br>P=0.496  | 0.019 (-1.285, 1.323)<br>P=0.973  | -0.086 (-0.609, 0.438)<br>P=0.710                           |
| Lack of time or low priority    | 32                      | 0.100 (-0.113, 0.313)<br>P=0.345                          | 0.065 (-0.180, 0.311)<br>P=0.591  | -0.112 (-0.316, 0.092)<br>P=0.271 | -0.403 (-0.986, 0.181)<br>P=0.168 | 0.095 (-0.294, 0.485)<br>P=0.617                            |

| Reasons                          | No. of included surveys | Estimated coefficients (95% confidence interval); P-value |                                                      |                                   |                                                         |                                   |
|----------------------------------|-------------------------|-----------------------------------------------------------|------------------------------------------------------|-----------------------------------|---------------------------------------------------------|-----------------------------------|
|                                  |                         | Abstracts vs. other sources                               | Trials only vs. mixed designs                        | Surveys up to 2002 vs. since 2003 | % Response rate                                         | Rate of non-submission            |
| Not important or negative result | 19                      | -0.288 (-0.576, 0.000)<br><b>P=0.050<sup>(2)</sup></b>    | 0.267 (-0.109, 0.643)<br>P=0.152                     | 0.075 (-0.277, 0.428)<br>P=0.657  | -0.187 (-1.059, 0.686)<br>P=0.656                       | -0.134 (-0.695, 0.426)<br>P=0.613 |
| Poor study quality or design     | 16                      | -0.123 (-0.395, 0.149)<br>P=0.349                         | -0.191 (-0.546, 0.164)<br>P=0.268                    | 0.016 (-0.259, 0.290)<br>P=0.902  | 0.309 (-0.436, 1.055)<br>P=0.386                        | -0.036 (-0.499, 0.426)<br>P=0.868 |
| Sponsor/funder problems          | 4                       | -0.452 (-1.174, 0.270)<br>P=0.115                         | -0.452 (-1.174, 0.270)<br>P=0.115                    | -0.087 (-1.479, 1.305)<br>P=0.813 | 0.491 (-2.552, 3.534)<br>P=0.559                        | -0.706 (-4.819, 3.407)<br>P=0.274 |
| Author/co-author problems        | 14                      | 0.126 (-0.270, 0.521)<br>P=0.502                          | 0.376 (0.100, 0.652)<br><b>P=0.012<sup>(3)</sup></b> | -0.018 (-0.303, 0.267)<br>P=0.893 | -0.867 (-1.573, -0.161)<br><b>P=0.020<sup>(4)</sup></b> | -0.218 (-0.686, 0.251)<br>P=0.325 |

**Notes to Appendix 4:**

1. The Freeman-Tukey transformed proportions from primary studies were used in random-effects meta-regression (using STATA ‘metareg’ command)
2. Further details for the four significant findings. (1) A higher proportion of journal rejection was associated with a lower proportion of non-submission; proportion difference corresponding to a 10% difference in non-submission: 0.7% (0.3%, 1.1%); P<0.001. (2) Not important or negative result was more frequently used as a reason for non-publication of studies identified from protocols or other sources, compared with unpublished abstracts; proportion difference: 2.1% (0.0%, 8.1%); P=0.05. (3) Author or co-author problem was more frequently used as a reason for non-publication of trials, compared with non-publication of studies with mixed or other design; proportion difference: 3.5% (0.3%, 10.3%); P=0.012. (4) A higher proportion of author/co-author problem was associated with a lower response rate; proportion difference corresponding to a 10% difference in author/co-author problem: 0.2% (0.01%, 0.6%); P=0.02.
